# Supplementary material
Source: MDPI journal article supplement (https://www.mdpi.com/2073-445X/12/10/1900)
Supplement: s1 [file s1]

## Multicriteria analysis in Apiculture: a sustainable tool for rural development in communities and conservation areas of Northwest Peru

**Supplementary 1. Pairwise comparison matrix to evaluate the importance of sub-criteria and sub-models for the identification of suitability areas for beekeeping.**

*a) Paired comparison matrix to assess the relative importance of the biophysical sub-criteria.*

| Expert 1                      | Paired Comparasion Matrix |       |      |       |      |      | Normalized Comparasion Matrix |      |      |      |      |      | Prioritization Vector (PV) | Weighted Sum Vector (WSV) | WSV/PV | n                | 6      |
|-------------------------------|---------------------------|-------|------|-------|------|------|-------------------------------|------|------|------|------|------|----------------------------|---------------------------|--------|------------------|--------|
|                               | [1]                       | [2]   | [3]  | [4]   | [5]  | [6]  | [1]                           | [2]  | [3]  | [4]  | [5]  | [6]  |                            |                           |        |                  |        |
| [1] Land cover / Land use     | 1.00                      | 3.00  | 3.00 | 3.00  | 3.00 | 2.00 | 0.35                          | 0.23 | 0.53 | 0.30 | 0.32 | 0.29 | 0.34                       | 2.184                     | 6.50   | $\lambda_{\max}$ | 6.3067 |
| [2] Slope                     | 0.33                      | 1.00  | 0.33 | 0.50  | 0.50 | 0.50 | 0.12                          | 0.08 | 0.06 | 0.05 | 0.05 | 0.07 | 0.07                       | 0.443                     | 6.22   | IC               | 0.0613 |
| [3] Distance to water systems | 0.33                      | 3.00  | 1.00 | 3.00  | 2.00 | 2.00 | 0.12                          | 0.23 | 0.18 | 0.30 | 0.21 | 0.29 | 0.22                       | 1.410                     | 6.40   | IA               | 1.252  |
| [4] Elevation                 | 0.33                      | 2.00  | 0.33 | 1.00  | 2.00 | 0.50 | 0.12                          | 0.15 | 0.06 | 0.10 | 0.21 | 0.07 | 0.12                       | 0.738                     | 6.22   | RC               | 0.0490 |
| [5] Temperature               | 0.33                      | 2.00  | 0.50 | 0.50  | 1.00 | 1.00 | 0.12                          | 0.15 | 0.09 | 0.05 | 0.11 | 0.14 | 0.11                       | 0.678                     | 6.18   |                  |        |
| [6] Precipitation             | 0.50                      | 2.00  | 0.50 | 2.00  | 1.00 | 1.00 | 0.18                          | 0.15 | 0.09 | 0.20 | 0.11 | 0.14 | 0.14                       | 0.912                     | 6.31   |                  |        |
| $\Sigma$                      | 2.83                      | 13.00 | 5.67 | 10.00 | 9.50 | 7.00 | 1.00                          | 1.00 | 1.00 | 1.00 | 1.00 | 1.00 | 1.00                       |                           |        |                  |        |

  

| Expert 2                      | Paired Comparasion Matrix |       |      |       |      |      | Normalized Comparasion Matrix |      |      |      |      |      | Prioritization Vector (PV) | Weighted Sum Vector (WSV) | WSV/PV | n                | 6      |
|-------------------------------|---------------------------|-------|------|-------|------|------|-------------------------------|------|------|------|------|------|----------------------------|---------------------------|--------|------------------|--------|
|                               | [1]                       | [2]   | [3]  | [4]   | [5]  | [6]  | [1]                           | [2]  | [3]  | [4]  | [5]  | [6]  |                            |                           |        |                  |        |
| [1] Land cover / Land use     | 1.00                      | 5.00  | 4.00 | 5.00  | 5.00 | 5.00 | 0.49                          | 0.25 | 0.52 | 0.41 | 0.57 | 0.52 | 0.46                       | 3.031                     | 6.62   | $\lambda_{\max}$ | 6.4489 |
| [2] Slope                     | 0.20                      | 1.00  | 0.25 | 0.25  | 0.33 | 0.33 | 0.10                          | 0.05 | 0.03 | 0.02 | 0.04 | 0.03 | 0.05                       | 0.283                     | 6.23   | IC               | 0.0898 |
| [3] Distance to water systems | 0.25                      | 4.00  | 1.00 | 2.00  | 1.00 | 1.00 | 0.12                          | 0.20 | 0.13 | 0.16 | 0.11 | 0.10 | 0.14                       | 0.892                     | 6.44   | IA               | 1.252  |
| [4] Elevation                 | 0.20                      | 4.00  | 0.50 | 1.00  | 1.00 | 0.33 | 0.10                          | 0.20 | 0.06 | 0.08 | 0.11 | 0.03 | 0.10                       | 0.614                     | 6.23   | RC               | 0.0717 |
| [5] Temperature               | 0.20                      | 3.00  | 1.00 | 1.00  | 1.00 | 2.00 | 0.10                          | 0.15 | 0.13 | 0.08 | 0.11 | 0.21 | 0.13                       | 0.855                     | 6.59   |                  |        |
| [6] Precipitation             | 0.20                      | 3.00  | 1.00 | 3.00  | 0.50 | 1.00 | 0.10                          | 0.15 | 0.13 | 0.24 | 0.06 | 0.10 | 0.13                       | 0.857                     | 6.58   |                  |        |
| $\Sigma$                      | 2.05                      | 20.00 | 7.75 | 12.25 | 8.83 | 9.67 | 1.00                          | 1.00 | 1.00 | 1.00 | 1.00 | 1.00 | 1.00                       |                           |        |                  |        |

| Expert 3                         | Paired Comparasion Matrix |       |      |       |       |      | Normalized Comparasion Matrix |      |      |      |      |      | Prioritization Vector<br>(PV) | Weighted<br>Sum Vector<br>(WSV) | WSV/PV | n               | 6      |
|----------------------------------|---------------------------|-------|------|-------|-------|------|-------------------------------|------|------|------|------|------|-------------------------------|---------------------------------|--------|-----------------|--------|
|                                  | [1]                       | [2]   | [3]  | [4]   | [5]   | [6]  | [1]                           | [2]  | [3]  | [4]  | [5]  | [6]  |                               |                                 |        |                 |        |
| [1] Land cover /<br>Land use     | 1.00                      | 3.00  | 5.00 | 3.00  | 3.00  | 3.00 | 0.39                          | 0.21 | 0.67 | 0.41 | 0.24 | 0.31 | 0.37                          | 2.672                           | 7.19   | $\lambda_{max}$ | 6.5566 |
| [2] Slope                        | 0.33                      | 1.00  | 0.33 | 0.33  | 0.50  | 0.50 | 0.13                          | 0.07 | 0.04 | 0.05 | 0.04 | 0.05 | 0.06                          | 0.410                           | 6.41   | IC              | 0.1113 |
| [3] Distance to<br>water systems | 0.20                      | 3.00  | 1.00 | 2.00  | 3.00  | 3.00 | 0.08                          | 0.21 | 0.13 | 0.27 | 0.24 | 0.31 | 0.21                          | 1.393                           | 6.71   | IA              | 1.252  |
| [4] Elevation                    | 0.33                      | 3.00  | 0.50 | 1.00  | 2.00  | 2.00 | 0.13                          | 0.21 | 0.07 | 0.14 | 0.16 | 0.20 | 0.15                          | 0.981                           | 6.45   | RC              | 0.0889 |
| [5] Temperature                  | 0.33                      | 2.00  | 0.33 | 0.50  | 1.00  | 0.33 | 0.13                          | 0.14 | 0.04 | 0.07 | 0.08 | 0.03 | 0.08                          | 0.521                           | 6.24   |                 |        |
| [6] Precipitation                | 0.33                      | 2.00  | 0.33 | 0.50  | 3.00  | 1.00 | 0.13                          | 0.14 | 0.04 | 0.07 | 0.24 | 0.10 | 0.12                          | 0.769                           | 6.33   |                 |        |
| $\Sigma$                         | 2.53                      | 14.00 | 7.50 | 7.33  | 12.50 | 9.83 | 1.00                          | 1.00 | 1.00 | 1.00 | 1.00 | 1.00 | 1.00                          |                                 |        |                 |        |
| Expert 4                         | Paired Comparasion Matrix |       |      |       |       |      | Normalized Comparasion Matrix |      |      |      |      |      | Prioritization Vector<br>(PV) | Weighted<br>Sum Vector<br>(WSV) | WSV/PV | n               | 6      |
|                                  | [1]                       | [2]   | [3]  | [4]   | [5]   | [6]  | [1]                           | [2]  | [3]  | [4]  | [5]  | [6]  |                               |                                 |        |                 |        |
| [1] Land cover /<br>Land use     | 1.00                      | 5.00  | 3.00 | 5.00  | 3.00  | 3.00 | 0.42                          | 0.29 | 0.55 | 0.42 | 0.29 | 0.36 | 0.39                          | 2.550                           | 6.58   | $\lambda_{max}$ | 6.3570 |
| [2] Slope                        | 0.20                      | 1.00  | 0.33 | 0.33  | 0.50  | 0.33 | 0.08                          | 0.06 | 0.06 | 0.03 | 0.05 | 0.04 | 0.05                          | 0.332                           | 6.26   | IC              | 0.0714 |
| [3] Distance to<br>water systems | 0.33                      | 3.00  | 1.00 | 3.00  | 2.00  | 3.00 | 0.14                          | 0.18 | 0.18 | 0.25 | 0.19 | 0.36 | 0.22                          | 1.442                           | 6.65   | IA              | 1.252  |
| [4] Elevation                    | 0.20                      | 3.00  | 0.33 | 1.00  | 2.00  | 0.50 | 0.08                          | 0.18 | 0.06 | 0.08 | 0.19 | 0.06 | 0.11                          | 0.671                           | 6.14   | RC              | 0.0570 |
| [5] Temperature                  | 0.33                      | 2.00  | 0.50 | 0.50  | 1.00  | 0.50 | 0.14                          | 0.12 | 0.09 | 0.04 | 0.10 | 0.06 | 0.09                          | 0.560                           | 6.17   |                 |        |
| [6] Precipitation                | 0.33                      | 3.00  | 0.33 | 2.00  | 2.00  | 1.00 | 0.14                          | 0.18 | 0.06 | 0.17 | 0.19 | 0.12 | 0.14                          | 0.903                           | 6.34   |                 |        |
| $\Sigma$                         | 2.40                      | 17.00 | 5.50 | 11.83 | 10.50 | 8.33 | 1.00                          | 1.00 | 1.00 | 1.00 | 1.00 | 1.00 | 1.00                          |                                 |        |                 |        |
| Expert 5                         | Paired Comparasion Matrix |       |      |       |       |      | Normalized Comparasion Matrix |      |      |      |      |      | Prioritization Vector<br>(PV) | Weighted<br>Sum Vector<br>(WSV) | WSV/PV | n               | 6      |
|                                  | [1]                       | [2]   | [3]  | [4]   | [5]   | [6]  | [1]                           | [2]  | [3]  | [4]  | [5]  | [6]  |                               |                                 |        |                 |        |
| [1] Land cover /<br>Land use     | 1.00                      | 3.00  | 3.00 | 3.00  | 5.00  | 3.00 | 0.39                          | 0.21 | 0.53 | 0.41 | 0.32 | 0.31 | 0.36                          | 2.419                           | 6.65   | $\lambda_{max}$ | 6.5322 |
| [2] Slope                        | 0.33                      | 1.00  | 0.33 | 0.50  | 0.50  | 0.33 | 0.13                          | 0.07 | 0.06 | 0.07 | 0.03 | 0.03 | 0.07                          | 0.416                           | 6.28   | IC              | 0.1064 |
| [3] Distance to<br>water systems | 0.33                      | 3.00  | 1.00 | 2.00  | 3.00  | 2.00 | 0.13                          | 0.21 | 0.18 | 0.27 | 0.19 | 0.21 | 0.20                          | 1.333                           | 6.68   | IA              | 1.252  |
| [4] Elevation                    | 0.33                      | 2.00  | 0.50 | 1.00  | 2.00  | 3.00 | 0.13                          | 0.14 | 0.09 | 0.14 | 0.13 | 0.31 | 0.16                          | 1.078                           | 6.87   | RC              | 0.0850 |
| [5] Temperature                  | 0.20                      | 2.00  | 0.33 | 0.50  | 1.00  | 0.25 | 0.08                          | 0.14 | 0.06 | 0.07 | 0.06 | 0.03 | 0.07                          | 0.458                           | 6.26   |                 |        |
| [6] Precipitation                | 0.33                      | 3.00  | 0.50 | 0.33  | 4.00  | 1.00 | 0.13                          | 0.21 | 0.09 | 0.05 | 0.26 | 0.10 | 0.14                          | 0.905                           | 6.45   |                 |        |
| $\Sigma$                         | 2.53                      | 14.00 | 5.67 | 7.33  | 15.50 | 9.58 | 1.00                          | 1.00 | 1.00 | 1.00 | 1.00 | 1.00 | 1.00                          |                                 |        |                 |        |
| Expert 6                         | Paired Comparasion Matrix |       |      |       |       |      | Normalized Comparasion Matrix |      |      |      |      |      | Prioritization Vector<br>(PV) | Weighted<br>Sum Vector<br>(WSV) | WSV/PV | n               | 6      |
|                                  | [1]                       | [2]   | [3]  | [4]   | [5]   | [6]  | [1]                           | [2]  | [3]  | [4]  | [5]  | [6]  |                               |                                 |        |                 |        |

|                               |      |       |      |       |       |      |      |      |      |      |      |      |      |       |      |                 |        |
|-------------------------------|------|-------|------|-------|-------|------|------|------|------|------|------|------|------|-------|------|-----------------|--------|
| [1] Land cover / Land use     | 1.00 | 4.00  | 3.00 | 3.00  | 3.00  | 2.00 | 0.36 | 0.29 | 0.51 | 0.26 | 0.27 | 0.29 | 0.33 | 2.198 | 6.64 | $\lambda_{max}$ | 6.5341 |
| [2] Slope                     | 0.25 | 1.00  | 0.50 | 0.50  | 0.50  | 0.33 | 0.09 | 0.07 | 0.09 | 0.04 | 0.05 | 0.05 | 0.06 | 0.415 | 6.47 | IC              | 0.1068 |
| [3] Distance to water systems | 0.33 | 2.00  | 1.00 | 2.00  | 2.00  | 3.00 | 0.12 | 0.14 | 0.17 | 0.17 | 0.18 | 0.43 | 0.20 | 1.448 | 7.09 | IA              | 1.252  |
| [4] Elevation                 | 0.33 | 2.00  | 0.50 | 1.00  | 0.50  | 0.33 | 0.12 | 0.14 | 0.09 | 0.09 | 0.05 | 0.05 | 0.09 | 0.551 | 6.24 | RC              | 0.0853 |
| [5] Temperature               | 0.33 | 2.00  | 0.50 | 2.00  | 1.00  | 0.25 | 0.12 | 0.14 | 0.09 | 0.17 | 0.09 | 0.04 | 0.11 | 0.677 | 6.24 |                 |        |
| [6] Precipitation             | 0.50 | 3.00  | 0.33 | 3.00  | 4.00  | 1.00 | 0.18 | 0.21 | 0.06 | 0.26 | 0.36 | 0.14 | 0.20 | 1.329 | 6.52 |                 |        |
| $\Sigma$                      | 2.75 | 14.00 | 5.83 | 11.50 | 11.00 | 6.92 | 1.00 | 1.00 | 1.00 | 1.00 | 1.00 | 1.00 | 1.00 |       |      |                 |        |

| Expert average                | Paired Comparasion Matrix |     |     |     |     |     | Normalized Comparasion Matrix |     |     |     |     |     | Prioritization Vector (PV) | Weighted Sum Vector (WSV) | WSV/PV | n | 6 |                 |        |
|-------------------------------|---------------------------|-----|-----|-----|-----|-----|-------------------------------|-----|-----|-----|-----|-----|----------------------------|---------------------------|--------|---|---|-----------------|--------|
|                               | [1]                       | [2] | [3] | [4] | [5] | [6] | [1]                           | [2] | [3] | [4] | [5] | [6] |                            |                           |        |   |   |                 |        |
| [1] Land cover / Land use     |                           |     |     |     |     |     |                               |     |     |     |     |     | 0.37                       |                           |        |   |   | $\lambda_{max}$ | 6.4559 |
| [2] Slope                     |                           |     |     |     |     |     |                               |     |     |     |     |     | 0.06                       |                           |        |   |   | IC              | 0.0912 |
| [3] Distance to water systems |                           |     |     |     |     |     |                               |     |     |     |     |     | 0.20                       |                           |        |   |   | IA              | 1.252  |
| [4] Elevation                 |                           |     |     |     |     |     |                               |     |     |     |     |     | 0.12                       |                           |        |   |   | RC              | 0.0728 |
| [5] Temperature               |                           |     |     |     |     |     |                               |     |     |     |     |     | 0.10                       |                           |        |   |   |                 |        |
| [6] Precipitation             |                           |     |     |     |     |     |                               |     |     |     |     |     | 0.15                       |                           |        |   |   |                 |        |
| $\Sigma$                      |                           |     |     |     |     |     |                               |     |     |     |     |     | 1.00                       |                           |        |   |   |                 |        |

b) *Paired comparison matrix to assess the relative importance of the socioeconomic sub-criteria.*

| Expert 1                    | Paired Comparasion Matrix |      | Normalized Comparasion Matrix |      | Prioritization Vector (PV) |
|-----------------------------|---------------------------|------|-------------------------------|------|----------------------------|
|                             | [1]                       | [2]  | [1]                           | [2]  |                            |
| [1] Distance to roads       | 1.00                      | 0.33 | 0.25                          | 0.25 | 0.25                       |
| [2] Distance to urban areas | 3.00                      | 1.00 | 0.75                          | 0.75 | 0.75                       |
| $\Sigma$                    | 4.00                      | 1.33 | 1.00                          | 1.00 | 1.00                       |

  

| Expert 2                    | Paired Comparasion Matrix |      | Normalized Comparasion Matrix |      | Prioritization Vector (PV) |
|-----------------------------|---------------------------|------|-------------------------------|------|----------------------------|
|                             | [1]                       | [2]  | [1]                           | [2]  |                            |
| [1] Distance to roads       | 1.00                      | 0.20 | 0.17                          | 0.17 | 0.17                       |
| [2] Distance to urban areas | 5.00                      | 1.00 | 0.83                          | 0.83 | 0.83                       |
| $\Sigma$                    | 6.00                      | 1.20 | 1.00                          | 1.00 | 1.00                       |

  

| Expert 3                    | Paired Comparasion Matrix |      | Normalized Comparasion Matrix |      | Prioritization Vector (PV) |
|-----------------------------|---------------------------|------|-------------------------------|------|----------------------------|
|                             | [1]                       | [2]  | [1]                           | [2]  |                            |
| [1] Distance to roads       | 1.00                      | 2.00 | 0.67                          | 0.67 | 0.67                       |
| [2] Distance to urban areas | 0.50                      | 1.00 | 0.33                          | 0.33 | 0.33                       |
| $\Sigma$                    | 1.50                      | 3.00 | 1.00                          | 1.00 | 1.00                       |

  

| Expert 4                    | Paired Comparasion Matrix |      | Normalized Comparasion Matrix |      | Prioritization Vector (PV) |
|-----------------------------|---------------------------|------|-------------------------------|------|----------------------------|
|                             | [1]                       | [2]  | [1]                           | [2]  |                            |
| [1] Distance to roads       | 1.00                      | 1.00 | 0.50                          | 0.50 | 0.50                       |
| [2] Distance to urban areas | 1.00                      | 1.00 | 0.50                          | 0.50 | 0.50                       |
| $\Sigma$                    | 2.00                      | 2.00 | 1.00                          | 1.00 | 1.00                       |

  

| Expert 5                    | Paired Comparasion Matrix |      | Normalized Comparasion Matrix |      | Prioritization Vector (PV) |
|-----------------------------|---------------------------|------|-------------------------------|------|----------------------------|
|                             | [1]                       | [2]  | [1]                           | [2]  |                            |
| [1] Distance to roads       | 1.00                      | 3.00 | 0.75                          | 0.75 | 0.75                       |
| [2] Distance to urban areas | 0.33                      | 1.00 | 0.25                          | 0.25 | 0.25                       |
| $\Sigma$                    | 1.33                      | 4.00 | 1.00                          | 1.00 | 1.00                       |

  

| Expert 6 | Paired Comparasion Matrix |     | Normalized Comparasion Matrix |     | Prioritization Vector (PV) |
|----------|---------------------------|-----|-------------------------------|-----|----------------------------|
|          | [1]                       | [2] | [1]                           | [2] |                            |

|                             |      |      |      |      |      |
|-----------------------------|------|------|------|------|------|
| [1] Distance to roads       | 1.00 | 0.50 | 0.33 | 0.33 | 0.33 |
| [2] Distance to urban areas | 2.00 | 1.00 | 0.67 | 0.67 | 0.67 |
| $\Sigma$                    | 3.00 | 1.50 | 1.00 | 1.00 | 1.00 |

  

| Expert average              | Paired Comparasion Matrix |     | Normalized Comparasion Matrix |     | Prioritization Vector (PV) |
|-----------------------------|---------------------------|-----|-------------------------------|-----|----------------------------|
|                             | [1]                       | [2] | [1]                           | [2] |                            |
| [1] Distance to roads       |                           |     |                               |     | 0.44                       |
| [2] Distance to urban areas |                           |     |                               |     | 0.56                       |
| $\Sigma$                    |                           |     |                               |     | 1.00                       |

c) *Pairwise comparison matrix to evaluate the importance of sub-models prior to final modeling*

| Expert 1          | Paired Comparasion Matrix |      | Normalized Comparasion Matrix |      | Prioritization Vector (PV) |
|-------------------|---------------------------|------|-------------------------------|------|----------------------------|
|                   | [1]                       | [2]  | [1]                           | [2]  |                            |
| [1] Biophysical   | 1.00                      | 2.00 | 0.67                          | 0.67 | 0.67                       |
| [2] Socioeconomic | 0.50                      | 1.00 | 0.33                          | 0.33 | 0.33                       |
| $\Sigma$          | 1.50                      | 3.00 | 1.00                          | 1.00 | 1.00                       |

  

| Expert 2          | Paired Comparasion Matrix |      | Normalized Comparasion Matrix |      | Prioritization Vector (PV) |
|-------------------|---------------------------|------|-------------------------------|------|----------------------------|
|                   | [1]                       | [2]  | [1]                           | [2]  |                            |
| [1] Biophysical   | 1.00                      | 1.00 | 0.50                          | 0.50 | 0.50                       |
| [2] Socioeconomic | 1.00                      | 1.00 | 0.50                          | 0.50 | 0.50                       |
| $\Sigma$          | 2.00                      | 2.00 | 1.00                          | 1.00 | 1.00                       |

  

| Expert 3          | Paired Comparasion Matrix |      | Normalized Comparasion Matrix |      | Prioritization Vector (PV) |
|-------------------|---------------------------|------|-------------------------------|------|----------------------------|
|                   | [1]                       | [2]  | [1]                           | [2]  |                            |
| [1] Biophysical   | 1.00                      | 2.00 | 0.67                          | 0.67 | 0.67                       |
| [2] Socioeconomic | 0.50                      | 1.00 | 0.33                          | 0.33 | 0.33                       |
| $\Sigma$          | 1.50                      | 3.00 | 1.00                          | 1.00 | 1.00                       |

  

| Expert 4        | Paired Comparasion Matrix |      | Normalized Comparasion Matrix |      | Prioritization Vector (PV) |
|-----------------|---------------------------|------|-------------------------------|------|----------------------------|
|                 | [1]                       | [2]  | [1]                           | [2]  |                            |
| [1] Biophysical | 1.00                      | 3.00 | 0.75                          | 0.75 | 0.75                       |

|                   |                           |      |                               |      |                            |
|-------------------|---------------------------|------|-------------------------------|------|----------------------------|
|                   |                           |      |                               |      |                            |
|                   | [2] Socioeconomic         | 0.33 | 1.00                          | 0.25 | 0.25                       |
|                   | $\Sigma$                  | 1.33 | 4.00                          | 1.00 | 1.00                       |
|                   |                           |      |                               |      |                            |
| Expert 5          | Paired Comparasion Matrix |      | Normalized Comparasion Matrix |      | Prioritization Vector (PV) |
|                   | [1]                       | [2]  | [1]                           | [2]  |                            |
| [1] Biophysical   | 1.00                      | 2.00 | 0.67                          | 0.67 | 0.67                       |
| [2] Socioeconomic | 0.50                      | 1.00 | 0.33                          | 0.33 | 0.33                       |
| $\Sigma$          | 1.50                      | 3.00 | 1.00                          | 1.00 | 1.00                       |
|                   |                           |      |                               |      |                            |
| Expert 6          | Paired Comparasion Matrix |      | Normalized Comparasion Matrix |      | Prioritization Vector (PV) |
|                   | [1]                       | [2]  | [1]                           | [2]  |                            |
| [1] Biophysical   | 1.00                      | 2.00 | 0.67                          | 0.67 | 0.67                       |
| [2] Socioeconomic | 0.50                      | 1.00 | 0.33                          | 0.33 | 0.33                       |
| $\Sigma$          | 1.50                      | 3.00 | 1.00                          | 1.00 | 1.00                       |
|                   |                           |      |                               |      |                            |
| Expert average    | Paired Comparasion Matrix |      | Normalized Comparasion Matrix |      | Prioritization Vector (PV) |
|                   | [1]                       | [2]  | [1]                           | [2]  |                            |
| [1] Biophysical   |                           |      |                               |      | 0.65                       |
| [2] Socioeconomic |                           |      |                               |      | 0.35                       |
| $\Sigma$          |                           |      |                               |      | 1.00                       |
